# Supplementary material for: A Meta-Analytical Way of Systematizing the Use of Hyaluronan Gels for the Relief of Osteoarthritis, Compared with New Treatment Alternatives
Source: Preprints.org preprint supplement (doi:10.20944/preprints202407.0178.v1), 2024-07-02
Supplement: Supplementary file 1 [file supplementary]

## Supplementary Materials

### A meta-analytical way of systematizing the use of hyaluronan gels for the relief of osteoarthritis, compared with new treatment alternatives

Tudor Pinteala<sup>1</sup>, Stelian Sergiu Maier<sup>\*2</sup> and Paul Dan Sirbu<sup>1,3</sup>

<sup>1</sup>Department Orthopedics and Traumatology, Clinical Rehabilitation Hospital, 700661 Iasi, Romania;

[tudor.pinteala@umfiasi.ro](mailto:tudor.pinteala@umfiasi.ro)

<sup>2</sup>Department of Chemical Engineering, Faculty of Industrial Design and Business Management, "Gheorghe Asachi" Technical University of Iasi, 73 Mangeron Blvd., 700050 Iasi, Romania; [smaier@tuiasi.ro](mailto:smaier@tuiasi.ro)

<sup>3</sup>Department of Orthopedics and Traumatology, Faculty of Medicine, "Grigore T. Popa" University of Medicine and Pharmacy, 700115 Iasi, Romania; [paul.sirbu@umfiasi.ro](mailto:paul.sirbu@umfiasi.ro)

\*Correspondence: [smaier@tuiasi.ro](mailto:smaier@tuiasi.ro)

**Table S1.** The full list of consulted articles (in ascending chronological order).

| No. | Acronym          | Reference details                                                                                                                                                                                                                                                                                                                 |
|-----|------------------|-----------------------------------------------------------------------------------------------------------------------------------------------------------------------------------------------------------------------------------------------------------------------------------------------------------------------------------|
| 1.  | (Andia, 2014)    | Andia, I.; Abate, M. Knee Osteoarthritis: Hyaluronic Acid, Platelet-Rich Plasma or Both in Association? <i>Expert Opin. Biol. Ther.</i> <b>2014</b> , <i>14</i> , 635–649.                                                                                                                                                        |
| 2.  | (Bannuru, 2014)  | Bannuru, R.R.; Vaysbrot, E.E.; Sullivan, M.C.; McAlindon, T.E. Relative Efficacy of Hyaluronic Acid in Comparison with NSAIDs for Knee Osteoarthritis: A Systematic Review and Meta-Analysis. <i>Semin. Arthritis Rheum.</i> <b>2014</b> , <i>43</i> , 593–599.                                                                   |
| 3.  | (Cross, 2014)    | Cross, M.; Smith, E.; Hoy, D.; Nolte, S.; Ackerman, I.; Fransen, M.; Bridgett, L.; Williams, S.; Guillemin, F.; Hill, C.L.; et al. The Global Burden of Hip and Knee Osteoarthritis: Estimates from the Global Burden of Disease 2010 Study. <i>Ann. Rheum. Dis.</i> <b>2014</b> , <i>73</i> , 1323–1330.                         |
| 4.  | (Leighton, 2014) | Leighton, R.; Akermark, C.; Therrien, R.; Richardson, J.B.; Andersson, M.; Todman, M.G.; Arden, N.K.; DUROLANE Study Group NASHA Hyaluronic Acid vs. Methylprednisolone for Knee Osteoarthritis: A Prospective, Multi-Centre, Randomized, Non-Inferiority Trial. <i>Osteoarthritis Cartilage</i> <b>2014</b> , <i>22</i> , 17–25. |
| 5.  | (Abate, 2015)    | Abate, M.; Vanni, D.; Pantalone, A.; Salini, V. Hyaluronic Acid in Knee Osteoarthritis: Preliminary Results Using a Four Months Administration Schedule. <i>Int. J. Rheum. Dis.</i> <b>2015</b> , <i>20</i> , 199–202.                                                                                                            |
| 6.  | (Altman, 2015)-1 | Altman, R.D.; Schemitsch, E.; Bedi, A. Assessment of Clinical Practice Guideline Methodology for the Treatment of Knee Osteoarthritis with Intra-Articular Hyaluronic Acid. <i>Semin. Arthritis Rheum.</i> <b>2015</b> , <i>45</i> , 132–139.                                                                                     |
| 7.  | (Altman, 2015)-2 | Altman, R.D.; Manjoo, A.; Fierlinger, A.; Niazi, F.; Nicholls, M. The Mechanism of Action for Hyaluronic Acid Treatment in the Osteoarthritic Knee: A Systematic Review. <i>BMC Musculoskelet. Disord.</i> <b>2015</b> , <i>16</i> , 321.                                                                                         |
| 8.  | (Filardo, 2015)  | Filardo, G.; Di Matteo, B.; Di Martino, A.; Merli, M.L.; Cenacchi, A.; Fornasari, P.; Marcacci, M.; Kon, E. Platelet-Rich Plasma Intra-Articular Knee Injections Show No Superiority Versus Viscosupplementation: A Randomized Controlled Trial. <i>Am. J. Sports Med.</i> <b>2015</b> , <i>43</i> , 1575–1582.                   |

|     |                     |                                                                                                                                                                                                                                                                                                                                           |
|-----|---------------------|-------------------------------------------------------------------------------------------------------------------------------------------------------------------------------------------------------------------------------------------------------------------------------------------------------------------------------------------|
| 9.  | (Henrotin, 2015)    | Henrotin, Y.; Raman, R.; Richette, P.; Bard, H.; Jerosch, J.; Conrozier, T.; Chevalier, X.; Migliore, A. Consensus Statement on Viscosupplementation with Hyaluronic Acid for the Management of Osteoarthritis. <i>Semin. Arthritis Rheum.</i> <b>2015</b> , <i>45</i> , 140–149.                                                         |
| 10. | (Petrella, 2015)    | Petrella, R.J.; Wakeford, C. Pain Relief and Improved Physical Function in Knee Osteoarthritis Patients Receiving Ongoing Hyal G-F 20, a High-Molecular-Weight Hyaluronan, versus Other Treatment Options: Data from a Large Real-World Longitudinal Cohort in Canada. <i>Drug Des. Devel. Ther.</i> <b>2015</b> , <i>9</i> , 5633–5640.  |
| 11. | (Cole, 2016)        | Cole, B.J.; Karas, V.; Hussey, K.; Pilz, K.; Fortier, L.A. Hyaluronic Acid Versus Platelet-Rich Plasma: A Prospective, Double-Blind Randomized Controlled Trial Comparing Clinical Outcomes and Effects on Intra-Articular Biology for the Treatment of Knee Osteoarthritis. <i>Am. J. Sports Med.</i> <b>2016</b> , <i>45</i> , 339–346. |
| 12. | (Ong, 2016)         | Ong, K.L.; Anderson, A.F.; Niazi, F.; Fierlinger, A.L.; Kurtz, S.M.; Altman, R.D. Hyaluronic Acid Injections in Medicare Knee Osteoarthritis Patients Are Associated With Longer Time to Knee Arthroplasty. <i>J. Arthroplasty</i> <b>2016</b> , <i>31</i> , 1667–1673.                                                                   |
| 13. | (Paterson, 2016)    | Paterson, K.L.; Nicholls, M.; Bennell, K.L.; Bates, D. Intra-Articular Injection of Photo-Activated Platelet-Rich Plasma in Patients with Knee Osteoarthritis: A Double-Blind, Randomized Controlled Pilot Study. <i>BMC Musculoskelet. Disord.</i> <b>2016</b> , <i>17</i> , 67.                                                         |
| 14. | (Strand, 2016)      | Strand, V.; Lim, S.; Takamura, J. Evidence for Safety of Retreatment with a Single Intra-Articular Injection of Gel-200 for Treatment of Osteoarthritis of the Knee from the Double-Blind Pivotal and Open-Label Retreatment Clinical Trials. <i>BMC Musculoskelet. Disord.</i> <b>2016</b> , <i>17</i> , 240.                            |
| 15. | (Trojian, 2016)     | Trojian, T.H.; Concoff, A.L.; Joy, S.M.; Hatzenbuehler, J.R.; Saulsberry, W.J.; Coleman, C.I. AMSSM Scientific Statement Concerning Viscosupplementation Injections for Knee Osteoarthritis: Importance for Individual Patient Outcomes. <i>Br. J. Sports Med.</i> <b>2016</b> , <i>50</i> , 84–92.                                       |
| 16. | (Vaishya, 2016)     | Vaishya, R.; Pariyo, G.B.; Agarwal, A.K.; Vijay, V. Non-Operative Management of Osteoarthritis of the Knee Joint. <i>J Clin Orthop Trauma</i> <b>2016</b> , <i>7</i> , 170–176.                                                                                                                                                           |
| 17. | (Temple-Wong, 2016) | Temple-Wong, M.M.; Ren, S.; Quach, P.; Hansen, B.C.; Chen, A.C.; Hasegawa, A.; D’Lima, D.D.; Koziol, J.; Masuda, K.; Lotz, M.K.; et al. Hyaluronan Concentration and Size Distribution in Human Knee Synovial Fluid: Variations with Age and Cartilage Degeneration. <i>Arthritis Res. Ther.</i> <b>2016</b> , <i>18</i> , 18.            |
| 18. | (Concoff, 2017)     | Concoff, A.; Sancheti, P.; Niazi, F.; Shaw, P.; Rosen, J. The Efficacy of Multiple versus Single Hyaluronic Acid Injections: A Systematic Review and Meta-Analysis. <i>BMC Musculoskelet. Disord.</i> <b>2017</b> , <i>18</i> , 542.                                                                                                      |
| 19. | (Cooper, 2017)      | Cooper, C.; Rannou, F.; Richette, P.; Bruyère, O.; Al-Daghri, N.; Altman, R.D.; Brandi, M.L.; Collaud Basset, S.; Herrero-Beaumont, G.; Migliore, A.; et al. Use of Intraarticular Hyaluronic Acid in the Management of Knee Osteoarthritis in Clinical Practice. <i>Arthritis Care Res.</i> <b>2017</b> , <i>69</i> , 1287–1296.         |
| 20. | (Delbarre, 2017)    | Delbarre, A.; Amor, B.; Bardoulat, I.; Tetafort, A.; Pelletier-Fleury, N. Do Intra-Articular Hyaluronic Acid Injections Delay Total Knee Replacement in Patients with Osteoarthritis - A Cox Model Analysis. <i>PLoS One</i> <b>2017</b> , <i>12</i> , e0187227.                                                                          |

|     |                    |                                                                                                                                                                                                                                                                                                                                                                                                                               |
|-----|--------------------|-------------------------------------------------------------------------------------------------------------------------------------------------------------------------------------------------------------------------------------------------------------------------------------------------------------------------------------------------------------------------------------------------------------------------------|
| 21. | (Duymus, 2017)     | Duymus, T.M.; Mutlu, S.; Dernek, B.; Komur, B.; Aydogmus, S.; Kesiktas, F.N. Choice of Intra-Articular Injection in Treatment of Knee Osteoarthritis: Platelet-Rich Plasma, Hyaluronic Acid or Ozone Options. <i>Knee Surg. Sports Traumatol. Arthrosc.</i> <b>2017</b> , <i>25</i> , 485–492.                                                                                                                                |
| 22. | (Görmeli, 2017)    | Görmeli, G.; Görmeli, C.A.; Ataoglu, B.; Çolak, C.; Aslantürk, O.; Ertem, K. Multiple PRP Injections Are More Effective than Single Injections and Hyaluronic Acid in Knees with Early Osteoarthritis: A Randomized, Double-Blind, Placebo-Controlled Trial. <i>Knee Surg. Sports Traumatol. Arthrosc.</i> <b>2017</b> , <i>25</i> , 958–965.                                                                                 |
| 23. | (Leung, 2017)      | Leung, Y.Y.; Huebner, J.L.; Haaland, B.; Wong, S.B.S.; Kraus, V.B. Synovial Fluid pro-Inflammatory Profile Differs according to the Characteristics of Knee Pain. <i>Osteoarthritis Cartilage</i> <b>2017</b> , <i>25</i> , 1420–1427.                                                                                                                                                                                        |
| 24. | (Raeissadat, 2017) | Raeissadat, S.A.; Rayegani, S.M.; Ahangar, A.G.; Abadi, P.H.; Mojgani, P.; Ahangar, O.G. Efficacy of Intra-Articular Injection of a Newly Developed Plasma Rich in Growth Factor (PRGF) Versus Hyaluronic Acid on Pain and Function of Patients with Knee Osteoarthritis: A Single-Blinded Randomized Clinical Trial. <i>Clin. Med. Insights Arthritis Musculoskelet. Disord.</i> <b>2017</b> , <i>10</i> , 1179544117733452. |
| 25. | (Shewale, 2017)    | Shewale, A.R.; Barnes, C.L.; Fischbach, L.A.; Ounpraseuth, S.T.; Painter, J.T.; Martin, B.C. Comparison of Low-, Moderate-, and High-Molecular-Weight Hyaluronic Acid Injections in Delaying Time to Knee Surgery. <i>J. Arthroplasty</i> <b>2017</b> , <i>32</i> , 2952–2957.e21.                                                                                                                                            |
| 26. | (Xing, 2017)       | Xing, D.; Wang, B.; Zhang, W.; Yang, Z.; Hou, Y.; Chen, Y.; Lin, J. Intra-Articular Hyaluronic Acid Injection in Treating Knee Osteoarthritis: Assessing Risk of Bias in Systematic Reviews with ROBIS Tool. <i>Int. J. Rheum. Dis.</i> <b>2017</b> , <i>20</i> , 1658–1673.                                                                                                                                                  |
| 27. | (Altman, 2018)     | Altman, R.; Hackel, J.; Niazi, F.; Shaw, P.; Nicholls, M. Efficacy and Safety of Repeated Courses of Hyaluronic Acid Injections for Knee Osteoarthritis: A Systematic Review. <i>Semin. Arthritis Rheum.</i> <b>2018</b> , <i>48</i> , 168–175.                                                                                                                                                                               |
| 28. | (Bert, 2018)       | Bert, J.; Kenney, J.; Sgaglione, N.A.; McClelland, S.; Brophy, R.; Toth, J.; Ruane, J.; Ali, Y.; Arquette, S.; Dasa, V.; et al. Viscosupplementation for Osteoarthritis of the Knee: A Key Opinion Leader Panel Discussion. <i>J Manag Care Spec Pharm</i> <b>2018</b> , <i>24</i> , S2–S8.                                                                                                                                   |
| 29. | (Bowman, 2018)     | Bowman, E.N.; Hallock, J.D.; Throckmorton, T.W.; Azar, F.M. Hyaluronic Acid Injections for Osteoarthritis of the Knee: Predictors of Successful Treatment. <i>Int. Orthop.</i> <b>2018</b> , <i>42</i> , 733–740.                                                                                                                                                                                                             |
| 30. | (Cao, 2018)        | Cao, Z.; Mai, X.; Wang, J.; Feng, E.; Huang, Y. Unicompartmental Knee Arthroplasty vs High Tibial Osteotomy for Knee Osteoarthritis: A Systematic Review and Meta-Analysis. <i>J. Arthroplasty</i> <b>2018</b> , <i>33</i> , 952–959.                                                                                                                                                                                         |
| 31. | (Mora, 2018)       | Mora, J.C.; Przkora, R.; Cruz-Almeida, Y. Knee Osteoarthritis: Pathophysiology and Current Treatment Modalities. <i>J. Pain Res.</i> <b>2018</b> , <i>11</i> , 2189–2196.                                                                                                                                                                                                                                                     |
| 32. | (Nelson, 2018)     | Nelson, F.R.T. The Value of Phenotypes in Knee Osteoarthritis Research. <i>Open Orthop. J.</i> <b>2018</b> , <i>12</i> , 105–114.                                                                                                                                                                                                                                                                                             |
| 33. | (Su, 2018)         | Su, K.; Bai, Y.; Wang, J.; Zhang, H.; Liu, H.; Ma, S. Comparison of Hyaluronic Acid and PRP Intra-Articular Injection with Combined                                                                                                                                                                                                                                                                                           |

|     |                       |                                                                                                                                                                                                                                                                                                                                                                                                                                  |
|-----|-----------------------|----------------------------------------------------------------------------------------------------------------------------------------------------------------------------------------------------------------------------------------------------------------------------------------------------------------------------------------------------------------------------------------------------------------------------------|
|     |                       | Intra-Articular and Intraosseous PRP Injections to Treat Patients with Knee Osteoarthritis. <i>Clin. Rheumatol.</i> <b>2018</b> , <i>37</i> , 1341–1350.                                                                                                                                                                                                                                                                         |
| 34. | (Bonitz, 2019)        | Bonitz, M.; Schaffer, C.; Amling, M.; Poertner, R.; Schinke, T.; Jeschke, A. Secreted Factors from Synovial Fibroblasts Immediately Regulate Gene Expression in Articular Chondrocytes. <i>Gene</i> <b>2019</b> , <i>698</i> , 1–8.                                                                                                                                                                                              |
| 35. | (Delgado, 2019)       | Delgado, D.; Garate, A.; Vincent, H.; Bilbao, A.M.; Patel, R.; Fiz, N.; Sampson, S.; Sánchez, M. Current Concepts in Intraosseous Platelet-Rich Plasma Injections for Knee Osteoarthritis. <i>J Clin Orthop Trauma</i> <b>2019</b> , <i>10</i> , 36–41.                                                                                                                                                                          |
| 36. | (Dhillon, 2019)       | Dhillon, M.S.; Patel, S.; Bansal, T. Improvising PRP for Use in Osteoarthritis Knee- Upcoming Trends and Futuristic View. <i>J Clin Orthop Trauma</i> <b>2019</b> , <i>10</i> , 32–35.                                                                                                                                                                                                                                           |
| 37. | (Huang, 2019)         | Huang, Y.; Liu, X.; Xu, X.; Liu, J. Intra-Articular Injections of Platelet-Rich Plasma, Hyaluronic Acid or Corticosteroids for Knee Osteoarthritis : A Prospective Randomized Controlled Study. <i>Orthopade</i> <b>2019</b> , <i>48</i> , 239–247.                                                                                                                                                                              |
| 38. | (Lin, 2019)           | Lin, K.-Y.; Yang, C.-C.; Hsu, C.-J.; Yeh, M.-L.; Renn, J.-H. Intra-Articular Injection of Platelet-Rich Plasma Is Superior to Hyaluronic Acid or Saline Solution in the Treatment of Mild to Moderate Knee Osteoarthritis: A Randomized, Double-Blind, Triple-Parallel, Placebo-Controlled Clinical Trial. <i>Arthroscopy</i> <b>2019</b> , <i>35</i> , 106–117.                                                                 |
| 39. | (Liu, 2019)           | Liu, S.-C.; Qiao, X.-F.; Tang, Q.-X.; Li, X.-G.; Yang, J.-H.; Wang, T.-Q.; Xiao, Y.-J.; Qiao, J.-M. Therapeutic Efficacy of Extracorporeal Shock Wave Combined with Hyaluronic Acid on Knee Osteoarthritis. <i>Medicine</i> <b>2019</b> , <i>98</i> , e14589.                                                                                                                                                                    |
| 40. | (Buendía-López, 2019) | Buendía-López, D.; Medina-Quirós, M.; Fernández-Villacañas Marín, M.Á. Clinical and Radiographic Comparison of a Single LP-PRP Injection, a Single Hyaluronic Acid Injection and Daily NSAID Administration with a 52-Week Follow-up: A Randomized Controlled Trial. <i>J. Orthop. Traumatol.</i> <b>2019</b> , <i>19</i> , 3.                                                                                                   |
| 41. | (Maheu, 2019)         | Maheu, E.; Bannuru, R.R.; Herrero-Beaumont, G.; Allali, F.; Bard, H.; Migliore, A. Why We Should Definitely Include Intra-Articular Hyaluronic Acid as a Therapeutic Option in the Management of Knee Osteoarthritis: Results of an Extensive Critical Literature Review. <i>Semin. Arthritis Rheum.</i> <b>2019</b> , <i>48</i> , 563–572.                                                                                      |
| 42. | (Matas, 2019)         | Matas, J.; Orrego, M.; Amenabar, D.; Infante, C.; Tapia-Limonchi, R.; Cadiz, M.I.; Alcayaga-Miranda, F.; González, P.L.; Muse, E.; Khoury, M.; et al. Umbilical Cord-Derived Mesenchymal Stromal Cells (MSCs) for Knee Osteoarthritis: Repeated MSC Dosing Is Superior to a Single MSC Dose and to Hyaluronic Acid in a Controlled Randomized Phase I/II Trial. <i>Stem Cells Transl. Med.</i> <b>2019</b> , <i>8</i> , 215–224. |
| 43. | (López-Ruiz, 2019)    | López-Ruiz, E.; Jiménez, G.; Álvarez de Cienfuegos, L.; Antic, C.; Sabata, R.; Marchal, J.A.; Gálvez-Martín, P. Advances of Hyaluronic Acid in Stem Cell Therapy and Tissue Engineering, Including Current Clinical Trials. <i>Eur. Cell. Mater.</i> <b>2019</b> , <i>37</i> , 186–213.                                                                                                                                          |
| 44. | (Tavassoli, 2019)     | Tavassoli, M.; Janmohammadi, N.; Hosseini, A.; Khafri, S.; Esmaeilnejad-Ganji, S.M. Single- and Double-Dose of Platelet-Rich Plasma versus Hyaluronic Acid for Treatment of Knee                                                                                                                                                                                                                                                 |

|     |                      |                                                                                                                                                                                                                                                                                                                               |
|-----|----------------------|-------------------------------------------------------------------------------------------------------------------------------------------------------------------------------------------------------------------------------------------------------------------------------------------------------------------------------|
|     |                      | Osteoarthritis: A Randomized Controlled Trial. <i>World J. Orthop.</i> <b>2019</b> , <i>10</i> , 310–326.                                                                                                                                                                                                                     |
| 45. | (Vaishya, 2019)      | Vaishya, R.; Vijay, V.; Lama, P.; Agarwal, A. Does Vitamin D Deficiency Influence the Incidence and Progression of Knee Osteoarthritis? - A Literature Review. <i>J Clin Orthop Trauma</i> <b>2019</b> , <i>10</i> , 9–15.                                                                                                    |
| 46. | (Vinod, 2019)        | Vinod, E.; James, J.V.; Sabareeswaran, A.; Amirtham, S.M.; Thomas, G.; Sathishkumar, S.; Ozbey, O.; Boopalan, P.R.J.V.C. Intraarticular Injection of Allogenic Chondroprogenitors for Treatment of Osteoarthritis in Rabbit Knee Model. <i>J Clin Orthop Trauma</i> <b>2019</b> , <i>10</i> , 16–23.                          |
| 47. | (Vitale, 2019)       | Vitale, N.D.; Vandenbulcke, F.; Chisari, E.; Iacono, F.; Lovato, L.; Di Matteo, B.; Kon, E. Innovative Regenerative Medicine in the Management of Knee OA: The Role of Autologous Protein Solution. <i>J Clin Orthop Trauma</i> <b>2019</b> , <i>10</i> , 49–52.                                                              |
| 48. | (Belsey, 2020)       | Belsey, J.; Yassen, S.K.; Jobson, S.; Faulkner, J.; Wilson, A.J. Return to Physical Activity After High Tibial Osteotomy or Unicompartmental Knee Arthroplasty: A Systematic Review and Pooling Data Analysis. <i>Am. J. Sports Med.</i> <b>2020</b> , <i>49</i> , 1372–1380.                                                 |
| 49. | (Billesberger, 2020) | Billesberger, L.M.; Fisher, K.M.; Qadri, Y.J.; Boortz-Marx, R.L. Procedural Treatments for Knee Osteoarthritis: A Review of Current Injectable Therapies. <i>Pain Res. Manag.</i> <b>2020</b> , <i>2020</i> , 3873098.                                                                                                        |
| 50. | (Chen, 2020)         | Chen, L.; Zheng, J.J.Y.; Li, G.; Yuan, J.; Ebert, J.R.; Li, H.; Papadimitrou, J.; Wang, Q.; Wood, D.; Jones, C.W.; Zheng, M. Pathogenesis and clinical management of obesity-related knee osteoarthritis: Impact of mechanical loading. <i>J Orthop Translat.</i> <b>2020</b> , <i>24</i> , 66–75.                            |
| 51. | (Koh, 2020)          | Koh, S.M.; Chan, C.K.; Teo, S.H.; Singh, S.; Merican, A.; Ng, W.M.; Abbas, A.; Kamarul, T. Elevated Plasma and Synovial Fluid Interleukin-8 and Interleukin-18 May Be Associated with the Pathogenesis of Knee Osteoarthritis. <i>Knee</i> <b>2020</b> , <i>27</i> , 26–35.                                                   |
| 52. | (Long, 2020)         | Long, H.; Zeng, X.; Liu, Q.; Wang, H.; Vos, T.; Hou, Y.; Lin, C.; Qiu, Y.; Wang, K.; Xing, D.; et al. Burden of Osteoarthritis in China, 1990–2017: Findings from the Global Burden of Disease Study 2017. <i>The Lancet Rheumatology</i> <b>2020</b> , <i>2</i> , e164–e172.                                                 |
| 53. | (Raeissadat, 2020)   | Raeissadat, S.A.; Gharooee Ahangar, A.; Rayegani, S.M.; Minator Sajjadi, M.; Ebrahimipour, A.; Yavari, P. Platelet-Rich Plasma-Derived Growth Factor vs Hyaluronic Acid Injection in the Individuals with Knee Osteoarthritis: A One Year Randomized Clinical Trial. <i>J. Pain Res.</i> <b>2020</b> , <i>13</i> , 1699–1711. |
| 54. | (Rezasoltani, 2020)  | Rezasoltani, Z.; Azizi, S.; Najafi, S.; Sanati, E.; Dadarkhah, A.; Abdorrazaghi, F. Physical Therapy, Intra-Articular Dextrose Prolotherapy, Botulinum Neurotoxin, and Hyaluronic Acid for Knee Osteoarthritis: Randomized Clinical Trial. <i>Int. J. Rehabil. Res.</i> <b>2020</b> , <i>43</i> , 219–227.                    |
| 55. | (Tang, 2020)         | Tang, J.Z.; Nie, M.J.; Zhao, J.Z.; Zhang, G.C.; Zhang, Q.; Wang, B. Platelet-Rich Plasma versus Hyaluronic Acid in the Treatment of Knee Osteoarthritis: A Meta-Analysis. <i>J. Orthop. Surg. Res.</i> <b>2020</b> , <i>15</i> , 403.                                                                                         |
| 56. | (Zhao, 2020)         | Zhao, J.; Huang, H.; Liang, G.; Zeng, L.-F.; Yang, W.; Liu, J. Effects and Safety of the Combination of Platelet-Rich Plasma (PRP) and Hyaluronic Acid (HA) in the Treatment of Knee Osteoarthritis: A                                                                                                                        |

|     |                      |                                                                                                                                                                                                                                                                                                                                                                                                              |
|-----|----------------------|--------------------------------------------------------------------------------------------------------------------------------------------------------------------------------------------------------------------------------------------------------------------------------------------------------------------------------------------------------------------------------------------------------------|
|     |                      | Systematic Review and Meta-Analysis. <i>BMC Musculoskelet. Disord.</i> <b>2020</b> , <i>21</i> , 224.                                                                                                                                                                                                                                                                                                        |
| 57. | (Baria, 2021)        | Baria, M.R.; Vasileff, W.K.; Borchers, J.; DiBartola, A.; Flanigan, D.C.; Plunkett, E.; Magnussen, R.A. Treating Knee Osteoarthritis With Platelet-Rich Plasma and Hyaluronic Acid Combination Therapy: A Systematic Review. <i>Am. J. Sports Med.</i> <b>2021</b> , <i>50</i> , 273–281.                                                                                                                    |
| 58. | (Boffa, 2021)        | Boffa, A.; Merli, G.; Andriolo, L.; Lattermann, C.; Salzmänn, G.M.; Filardo, G. Synovial Fluid Biomarkers in Knee Osteoarthritis: A Systematic Review and Quantitative Evaluation Using BIPEDs Criteria. <i>Cartilage</i> <b>2021</b> , <i>13</i> , 82S – 103S.                                                                                                                                              |
| 59. | (Belk, 2021)         | Belk, J.W.; Kraeutler, M.J.; Houck, D.A.; Goodrich, J.A.; Dragoo, J.L.; McCarty, E.C. Platelet-Rich Plasma Versus Hyaluronic Acid for Knee Osteoarthritis: A Systematic Review and Meta-Analysis of Randomized Controlled Trials. <i>Am. J. Sports Med.</i> <b>2021</b> , <i>49</i> , 249–260.                                                                                                               |
| 60. | (Dulic, 2021)        | Dulic, O.; Rasovic, P.; Lalic, I.; Kecojovic, V.; Gavrilovic, G.; Abazovic, D.; Maric, D.; Miskulin, M.; Bumbasirevic, M. Bone Marrow Aspirate Concentrate versus Platelet Rich Plasma or Hyaluronic Acid for the Treatment of Knee Osteoarthritis. <i>Medicina</i> <b>2021</b> , <i>57</i> , doi:10.3390/medicina57111193.                                                                                  |
| 61. | (Gupta, 2021)        | Gupta, A.; Maffulli, N.; Rodriguez, H.C.; Carson, E.W.; Bascharron, R.A.; Delfino, K.; Levy, H.J.; El-Amin, S.F., 3rd Safety and Efficacy of Umbilical Cord-Derived Wharton’s Jelly Compared to Hyaluronic Acid and Saline for Knee Osteoarthritis: Study Protocol for a Randomized, Controlled, Single-Blind, Multi-Center Trial. <i>J. Orthop. Surg. Res.</i> <b>2021</b> , <i>16</i> , 352.               |
| 62. | (Karasavvidis, 2021) | Karasavvidis, T.; Totlis, T.; Gilat, R.; Cole, B.J. Platelet-Rich Plasma Combined With Hyaluronic Acid Improves Pain and Function Compared With Hyaluronic Acid Alone in Knee Osteoarthritis: A Systematic Review and Meta-Analysis. <i>Arthroscopy</i> <b>2021</b> , <i>37</i> , 1277–1287.e1.                                                                                                              |
| 63. | (Oo, 2021)           | Oo, W.M.; Little, C.; Duong, V.; Hunter, D.J. The Development of Disease-Modifying Therapies for Osteoarthritis (DMOADs): The Evidence to Date. <i>Drug Des. Devel. Ther.</i> <b>2021</b> , <i>15</i> , 2921–2945.                                                                                                                                                                                           |
| 64. | (Park, 2021)         | Park, Y.-B.; Kim, J.-H.; Ha, C.-W.; Lee, D.-H. Clinical Efficacy of Platelet-Rich Plasma Injection and Its Association With Growth Factors in the Treatment of Mild to Moderate Knee Osteoarthritis: A Randomized Double-Blind Controlled Clinical Trial As Compared With Hyaluronic Acid. <i>Am. J. Sports Med.</i> <b>2021</b> , <i>49</i> , 487–496.                                                      |
| 65. | (Raeissadat, 2021)   | Raeissadat, S.A.; Ghazi Hosseini, P.; Bahrami, M.H.; Salman Roghani, R.; Fathi, M.; Gharooee Ahangar, A.; Darvish, M. The Comparison Effects of Intra-Articular Injection of Platelet Rich Plasma (PRP), Plasma Rich in Growth Factor (PRGF), Hyaluronic Acid (HA), and Ozone in Knee Osteoarthritis; a One Year Randomized Clinical Trial. <i>BMC Musculoskelet. Disord.</i> <b>2021</b> , <i>22</i> , 134. |
| 66. | (Sdeek, 2021)        | Sdeek, M.; Sabry, D.; El-Sdeek, H.; Darweash, A. Intra-Articular Injection of Platelet Rich Plasma versus Hyaluronic Acid for Moderate Knee Osteoarthritis. A Prospective, Double-Blind                                                                                                                                                                                                                      |

|     |                |                                                                                                                                                                                                                                                                                                                                                                                                         |
|-----|----------------|---------------------------------------------------------------------------------------------------------------------------------------------------------------------------------------------------------------------------------------------------------------------------------------------------------------------------------------------------------------------------------------------------------|
|     |                | Randomized Controlled Trial on 189 Patients with Follow-up for Three Years. <i>Acta Orthop. Belg.</i> <b>2021</b> , 87, 729–734.                                                                                                                                                                                                                                                                        |
| 67. | (Tan, 2021)    | Tan, J.; Chen, H.; Zhao, L.; Huang, W. Platelet-Rich Plasma Versus Hyaluronic Acid in the Treatment of Knee Osteoarthritis: A Meta-Analysis of 26 Randomized Controlled Trials. <i>Arthroscopy</i> <b>2021</b> , 37, 309–325.                                                                                                                                                                           |
| 68. | (Timur, 2021)  | Timur, U.T.; Jahr, H.; Anderson, J.; Green, D.C.; Emans, P.J.; Smagul, A.; van Rhijn, L.W.; Peffers, M.J.; Welting, T.J.M. Identification of Tissue-Dependent Proteins in Knee OA Synovial Fluid. <i>Osteoarthritis Cartilage</i> <b>2021</b> , 29, 124–133.                                                                                                                                            |
| 69. | (Wang, 2021)   | Wang, S.-J.; Wang, Y.-H.; Huang, L.-C. The Effect of Oral Low Molecular Weight Liquid Hyaluronic Acid Combination with Glucosamine and Chondroitin on Knee Osteoarthritis Patients with Mild Knee Pain: An 8-Week Randomized Double-Blind Placebo-Controlled Trial. <i>Medicine</i> <b>2021</b> , 100, e24252.<br>Referinte: No80-No71                                                                  |
| 70. | (Webner, 2021) | Webner, D.; Huang, Y.; Hummer, C.D., 3rd Intraarticular Hyaluronic Acid Preparations for Knee Osteoarthritis: Are Some Better Than Others? <i>Cartilage</i> <b>2021</b> , 13, 1619S – 1636S.                                                                                                                                                                                                            |
| 71. | (Zhao, 2021)   | Zhao, D.; Pan, J.-K.; Yang, W.-Y.; Han, Y.-H.; Zeng, L.-F.; Liang, G.-H.; Liu, J. Intra-Articular Injections of Platelet-Rich Plasma, Adipose Mesenchymal Stem Cells, and Bone Marrow Mesenchymal Stem Cells Associated With Better Outcomes Than Hyaluronic Acid and Saline in Knee Osteoarthritis: A Systematic Review and Network Meta-Analysis. <i>Arthroscopy</i> <b>2021</b> , 37, 2298–2314.e10. |
| 72. | (Bucci, 2022)  | Bucci, J.; Chen, X.; LaValley, M.; Nevitt, M.; Torner, J.; Lewis, C.E.; Felson, D.T. Progression of Knee Osteoarthritis With Use of Intraarticular Glucocorticoids Versus Hyaluronic Acid. <i>Arthritis Rheumatol</i> <b>2022</b> , 74, 223–226.                                                                                                                                                        |
| 73. | (Chavda, 2022) | Chavda, S.; Rabbani, S.A.; Wadhwa, T. Role and Effectiveness of Intra-Articular Injection of Hyaluronic Acid in the Treatment of Knee Osteoarthritis: A Systematic Review. <i>Cureus</i> <b>2022</b> , 14, e24503.                                                                                                                                                                                      |
| 74. | (Kim, 2022)    | Kim, Y.S.; Guilak, F. Engineering Hyaluronic Acid for the Development of New Treatment Strategies for Osteoarthritis. <i>Int. J. Mol. Sci.</i> <b>2022</b> , 23, doi:10.3390/ijms23158662.                                                                                                                                                                                                              |
| 75. | (Mao, 2022)    | Mao, B.; Pan, Y.; Zhang, Z.; Yu, Z.; Li, J.; Fu, W. Efficacy and Safety of Hyaluronic Acid Intra-Articular Injection after Arthroscopic Knee Surgery: A Systematic Review and Meta-Analysis. <i>Orthop. Surg.</i> <b>2022</b> , 15, 16–27.                                                                                                                                                              |
| 76. | (Singh, 2022)  | Singh, H.; Knapik, D.M.; Polce, E.M.; Eikani, C.K.; Bjornstad, A.H.; GURSOY, S.; Perry, A.K.; Westrick, J.C.; Yanke, A.B.; Verma, N.N.; et al. Relative Efficacy of Intra-Articular Injections in the Treatment of Knee Osteoarthritis: A Systematic Review and Network Meta-Analysis. <i>Am. J. Sports Med.</i> <b>2022</b> , 50, 3140–3148.                                                           |
| 77. | (Ta, 2022)     | Ta, C.N.; Vasudevan, R.; Mitchell, B.C.; Keller, R.A.; Kent, W.T. The Influence of Industry Affiliation on Randomized Controlled Trials of Platelet-Rich Plasma for Knee Osteoarthritis. <i>Am. J. Sports Med.</i> <b>2022</b> , 51, 3583–3590.                                                                                                                                                         |
| 78. | (Wang, 2022)   | Wang, Y.-C.; Lee, C.-L.; Chen, Y.-J.; Tien, Y.-C.; Lin, S.-Y.; Chen, C.-H.; Chou, P.P.-H.; Huang, H.-T. Comparing the Efficacy of Intra-Articular Single Platelet-Rich Plasma (PRP) versus Novel                                                                                                                                                                                                        |

|     |                    |                                                                                                                                                                                                                                                                                                                                                                                                                                     |
|-----|--------------------|-------------------------------------------------------------------------------------------------------------------------------------------------------------------------------------------------------------------------------------------------------------------------------------------------------------------------------------------------------------------------------------------------------------------------------------|
|     |                    | Crosslinked Hyaluronic Acid for Early-Stage Knee Osteoarthritis: A Prospective, Double-Blind, Randomized Controlled Trial. <i>Medicina</i> <b>2022</b> , <i>58</i> , doi:10.3390/medicina58081028.                                                                                                                                                                                                                                  |
| 79. | (Zhang, 2022)      | Zhang, Q.; Liu, T.; Gu, Y.; Gao, Y.; Ni, J. Efficacy and Safety of Platelet-Rich Plasma Combined with Hyaluronic Acid versus Platelet-Rich Plasma Alone for Knee Osteoarthritis: A Systematic Review and Meta-Analysis. <i>J. Orthop. Surg. Res.</i> <b>2022</b> , <i>17</i> , 499.                                                                                                                                                 |
| 80. | (Alahmed, 2023)    | Alahmed, S.K.; Mohyeldin, A.M.; Alshammari, A.; Alshammari, Z.F.; Alhamdi, R.A.; Alghaslan, S.A.; Alshammari, H.F.; Alshamry, F.F.; Alshammari, A.H.; Alhamdi, M.S. Knowledge and Awareness Regarding Osteoarthritis and Its Factors in Hail Region, Saudi Arabia. <i>Cureus</i> <b>2023</b> , <i>15</i> , e36557.                                                                                                                  |
| 81. | (Amirsaadat, 2023) | Amirsaadat, S.; Amirazad, H.; Hashemihsar, R.; Zarghami, N. An Update on the Effect of Intra-Articular Intervention Strategies Using Nanomaterials in Osteoarthritis: Possible Clinical Application. <i>Front Bioeng Biotechnol</i> <b>2023</b> , <i>11</i> , 1128856.                                                                                                                                                              |
| 82. | (Andronic, 2023)   | Andronic, O.; Claydon-Mueller, L.S.; Cubberley, R.; Karczewski, D.; Lu, V.; Khanduja, V. No Evidence Exists on Outcomes of Non-Operative Management in Patients with Femoroacetabular Impingement and Concomitant Tönnis Grade 2 or More Hip Osteoarthritis: A Scoping Review. <i>Knee Surg. Sports Traumatol. Arthrosc.</i> <b>2023</b> , <i>31</i> , 2103–2122.                                                                   |
| 83. | (Bąkowski, 2023)   | Bąkowski, P.; Kaszyński, J.; Baka, C.; Kaczmarek, T.; Ciemniewska-Gorzela, K.; Bąkowska-Żywicka, K.; Piontek, T. Patients with Stage II of the Knee Osteoarthritis Most Likely Benefit from the Intra-Articular Injections of Autologous Adipose Tissue-from 2 Years of Follow-up Studies. <i>Arch. Orthop. Trauma. Surg.</i> <b>2023</b> , <i>143</i> , 55–62.                                                                     |
| 84. | (Barman, 2023)     | Barman, A.; Bandyopadhyay, D.; Mohakud, S.; Sahoo, J.; Maiti, R.; Mukherjee, S.; Prakash, S.; Roy, S.S.; Viswanath, A. Comparison of Clinical Outcome, Cartilage Turnover, and Inflammatory Activity Following Either Intra-Articular or a Combination of Intra-Articular with Intra-Osseous Platelet-Rich Plasma Injections in Osteoarthritis Knee: A Randomized, Clinical Trial. <i>Injury</i> <b>2023</b> , <i>54</i> , 728–737. |
| 85. | (Belk, 2023)       | Belk, J.W.; Lim, J.J.; Keeter, C.; McCulloch, P.C.; Houck, D.A.; McCarty, E.C.; Frank, R.M.; Kraeutler, M.J. Patients With Knee Osteoarthritis Who Receive Platelet-Rich Plasma or Bone Marrow Aspirate Concentrate Injections Have Better Outcomes Than Patients Who Receive Hyaluronic Acid: Systematic Review and Meta-Analysis. <i>Arthroscopy</i> <b>2023</b> , <i>39</i> , 1714–1734.                                         |
| 86. | (Béret, 2023)      | Béret, M.; Barry, F.; Garcia-Fernandez, M.-J.; Chijcheapaza-Flores, H.; Blanchemain, N.; Chai, F.; Nicot, R. Efficacy of Intra-Articular Injection of Botulinum Toxin Type A (IncobotulinumtoxinA) in Temporomandibular Joint Osteoarthritis: A Three-Arm Controlled Trial in Rats. <i>Toxins</i> <b>2023</b> , <i>15</i> , doi:10.3390/toxins15040261.                                                                             |
| 87. | (Blicharski, 2023) | Blicharski, T.; Łukasik, P.; Plebanski, R.; Żęgota, Z.; Szuścik, M.; Moster, E.; Pavelka, K.; Jeon, S.; Park, S.L. Efficacy and Safety of Intra-Articular Cross-Linked Sodium Hyaluronate for the Treatment of Knee Osteoarthritis: A Prospective, Active-Controlled, Randomized, Parallel-Group, Double-Blind, Multicenter Study. <i>J. Clin. Med. Res.</i> <b>2023</b> , <i>12</i> , doi:10.3390/jcm12082982.                     |

|     |                     |                                                                                                                                                                                                                                                                                                                                                                                                                         |
|-----|---------------------|-------------------------------------------------------------------------------------------------------------------------------------------------------------------------------------------------------------------------------------------------------------------------------------------------------------------------------------------------------------------------------------------------------------------------|
| 88. | (Bowden, 2023)      | Bowden, D.J.; Eustace, S.J.; Kavanagh, E.C. The Value of Injectable Viscoelastic Supplements for Joints. <i>Skeletal Radiol.</i> <b>2023</b> , <i>52</i> , 933–940.                                                                                                                                                                                                                                                     |
| 89. | (Charnwachai, 2023) | Charnwachai, P.; Tammachote, R.; Tammachote, N.; Chaichana, T.; Kitkumthorn, N. Histological Features of Knee Osteoarthritis Treated with Triamcinolone Acetonide and Hyaluronic Acid. <i>Biomedical Reports</i> <b>2023</b> , <i>18</i> , 1–8.                                                                                                                                                                         |
| 90. | (Chen, 2023)        | Chen, L.; Jin, S.; Yao, Y.; He, S.; He, J. Comparison of Clinical Efficiency between Intra-Articular Injection of Platelet-Rich Plasma and Hyaluronic Acid for Osteoarthritis: A Meta-Analysis of Randomized Controlled Trials. <i>Ther. Adv. Musculoskelet. Dis.</i> <b>2023</b> , <i>15</i> , 1759720X231157043.                                                                                                      |
| 91. | (Costa, 2023)       | Costa, L.A.V.; Lenza, M.; Irrgang, J.J.; Fu, F.H.; Ferretti, M. How Does Platelet-Rich Plasma Compare Clinically to Other Therapies in the Treatment of Knee Osteoarthritis? A Systematic Review and Meta-Analysis. <i>Am. J. Sports Med.</i> <b>2023</b> , <i>51</i> , 1074–1086.                                                                                                                                      |
| 92. | (Conrozier, 2023)   | Conrozier, T.; Diraçoglù, D.; Monfort, J.; Chevalier, X.; Bard, H.; Baron, D.; Jerosch, J.; Migliore, A.; Richette, P.; Henrotin, Y. EUROVISCO Good Practice Recommendations for a First Viscosupplementation in Patients with Knee Osteoarthritis. <i>Cartilage</i> <b>2023</b> , <i>14</i> , 125–135.                                                                                                                 |
| 93. | (Clausen, 2023)     | Clausen, S.; Heerey, J.; Hartvigsen, J.; Kemp, J.L.; Arnbak, B. Do Imaging Findings Modify the Effect of Non-Surgical Treatment in Patients with Knee and Hip Osteoarthritis? A Systematic Literature Review. <i>BMJ Open</i> <b>2023</b> , <i>13</i> , e065373.                                                                                                                                                        |
| 94. | (Ciapini, 2023)     | Ciapini, G.; Simonettii, M.; Giuntoli, M.; Varchetta, G.; De Franco, S.; Ipponi, E.; Scaglione, M.; Parchi, P.D. Is the Combination of Platelet-Rich Plasma and Hyaluronic Acid the Best Injective Treatment for Grade II-III Knee Osteoarthritis? A Prospective Study. <i>Adv. Orthop.</i> <b>2023</b> , <i>2023</i> , 1868943.                                                                                        |
| 95. | (Chopin, 2023)      | Chopin, C.; Geoffroy, M.; Kanagaratnam, L.; Dorilleau, C.; Ecartot, F.; Siboni, R.; Salmon, J.-H. Prognostic Factors Related to Clinical Response in 210 Knees Treated by Platelet-Rich Plasma for Osteoarthritis. <i>Diagnostics (Basel)</i> <b>2023</b> , <i>13</i> , doi:10.3390/diagnostics13040760.                                                                                                                |
| 96. | (Cui, 2023)         | Cui, Y.; Lin, L.; Wang, Z.; Wang, K.; Xiao, L.; Lin, W.; Zhang, Y. Research Trends of Platelet-Rich Plasma Therapy on Knee Osteoarthritis from 2011 to 2021: A Review. <i>Medicine</i> <b>2023</b> , <i>102</i> , e32434.                                                                                                                                                                                               |
| 97. | (Gezer, 2023)       | Gezer, H.H.; Ostor, A. What Is New in Pharmacological Treatment for Osteoarthritis? <i>Best Pract. Res. Clin. Rheumatol.</i> <b>2023</b> , <i>37</i> , 101841.                                                                                                                                                                                                                                                          |
| 98. | (Gomes, 2023)       | Gomes, F.F.; Maranhão, D.A.; Gomes, M.S.; de Castro, I.M., Jr; Mansur, H. Effects of Hyaluronic Acid With Intra-Articular Corticosteroid Injections in the Management of Subtalar Post-Traumatic Osteoarthritis - Randomized Comparative Trial. <i>J. Foot Ankle Surg.</i> <b>2023</b> , <i>62</i> , 14–20.                                                                                                             |
| 99. | (Gomoll, 2023)      | Gomoll, A.H.; Mandelbaum, B.R.; Farr, J.; Archambault, W.T.; Sherman, S.L.; Tabet, S.K.; Kimmerling, K.A.; Mowry, K.C. An Initial Injection and a Crossover Injection of Amniotic Suspension Allograft Following Failed Treatment with Hyaluronic Acid or Saline Are Equally Effective in the Treatment of Moderate Symptomatic Knee Osteoarthritis Over 12 Months. <i>Arthroscopy</i> <b>2023</b> , <i>39</i> , 66–78. |

|      |                     |                                                                                                                                                                                                                                                                                                                                                                                    |
|------|---------------------|------------------------------------------------------------------------------------------------------------------------------------------------------------------------------------------------------------------------------------------------------------------------------------------------------------------------------------------------------------------------------------|
| 100. | (Habibi, 2023)      | Habibi, A.A.; Karia, R.J.; Ward, S.A.; Schwarzkopf, R.; Rozell, J.C.; Slover, J.D. Patient-Reported Outcomes Following Intra-Articular Hyaluronic Acid for Knee Osteoarthritis. <i>J. Arthroplasty</i> <b>2023</b> , <i>38</i> , S36–S41.                                                                                                                                          |
| 101. | (Hegab, 2023)       | Hegab, A.F.; Hameed, H.I.A.A.; Hassaneen, A.M.; Hyder, A. Synergistic Effect of Platelet Rich Plasma with Hyaluronic Acid Injection Following Arthrocentesis to Reduce Pain and Improve Function in TMJ Osteoarthritis. <i>J Stomatol Oral Maxillofac Surg</i> <b>2023</b> , <i>124</i> , 101340.                                                                                  |
| 102. | (Householder, 2023) | Householder, N.A.; Raghuram, A.; Agyare, K.; Thipaphay, S.; Zumwalt, M. A Review of Recent Innovations in Cartilage Regeneration Strategies for the Treatment of Primary Osteoarthritis of the Knee: Intra-Articular Injections. <i>Orthop J Sports Med</i> <b>2023</b> , <i>11</i> , 23259671231155950.                                                                           |
| 103. | (Jang, 2023)        | Jang, C.W.; Bang, M.; Park, J.H.; Cho, H.E. Impact of Changes in Clinical Practice Guidelines for Intra-Articular Injection Treatments for Knee Osteoarthritis on Public Interest and Social Media. <i>Osteoarthritis Cartilage</i> <b>2023</b> , <i>31</i> , 793–801.                                                                                                             |
| 104. | (Kamat, 2023)       | Kamat, Y.D.; Das, B.; Thakkar, K.; Mahajan, M. A Retrospective Observational Study Evaluating the Synergistic Effect of a Novel Combination of Alfapin + Native Type 2 Collagen + Mobilee (Hyaluronic Acid) + CurQlife (Curcumin) Nutraceuticals in the Symptomatic Improvement of Knee Osteoarthritis. <i>Cureus</i> <b>2023</b> , <i>15</i> , e36123.                            |
| 105. | (Khan, 2023)        | Khan, M.; Shanmugaraj, A.; Prada, C.; Patel, A.; Babins, E.; Bhandari, M. The Role of Hyaluronic Acid for Soft Tissue Indications: A Systematic Review and Meta-Analysis. <i>Sports Health</i> <b>2023</b> , <i>15</i> , 86–96.                                                                                                                                                    |
| 106. | (Kim, 2023)         | Kim, T.W.; Chang, M.J.; Shin, C.Y.; Chang, C.B.; Kang, S.-B. A Randomized Controlled Trial for Comparing Efficacy and Safety between Intraarticular Polynucleotide and Hyaluronic Acid for Knee Osteoarthritis Treatment. <i>Sci. Rep.</i> <b>2023</b> , <i>13</i> , 9419.                                                                                                         |
| 107. | (Lambova, 2023)     | Lambova, S.N. Knee Osteoarthritis-How Close Are We to Disease-Modifying Treatment: Emphasis on Metabolic Type Knee Osteoarthritis. <i>Life</i> <b>2023</b> , <i>13</i> , doi:10.3390/life13010140.                                                                                                                                                                                 |
| 108. | (Li, 2023)          | Li, S.; Xing, F.; Yan, T.; Zhang, S.; Chen, F. Multiple Injections of Platelet-Rich Plasma Versus Hyaluronic Acid for Knee Osteoarthritis: A Systematic Review and Meta-Analysis of Current Evidence in Randomized Controlled Trials. <i>J Pers Med</i> <b>2023</b> , <i>13</i> , doi:10.3390/jpm13030429.                                                                         |
| 109. | (Liao, 2023)        | Liao, C.-D.; Chen, H.-C.; Huang, M.-H.; Liou, T.-H.; Lin, C.-L.; Huang, S.-W. Comparative Efficacy of Intra-Articular Injection, Physical Therapy, and Combined Treatments on Pain, Function, and Sarcopenia Indices in Knee Osteoarthritis: A Network Meta-Analysis of Randomized Controlled Trials. <i>Int. J. Mol. Sci.</i> <b>2023</b> , <i>24</i> , doi:10.3390/ijms24076078. |
| 110. | (Lu, 2023)          | Lu, K.-H.; Lu, P.W.-A.; Lin, C.-W.; Lu, E.W.-H.; Yang, S.-F. Different Molecular Weights of Hyaluronan Research in Knee Osteoarthritis: A State-of-the-Art Review. <i>Matrix Biol.</i> <b>2023</b> , <i>117</i> , 46–71.                                                                                                                                                           |
| 111. | (Luo, 2023)         | Luo, Y.; Tan, J.; Zhou, Y.; Guo, Y.; Liao, X.; He, L.; Li, D.; Li, X.; Liu, Y. From Crosslinking Strategies to Biomedical Applications of                                                                                                                                                                                                                                          |

|      |                         |                                                                                                                                                                                                                                                                                                                                                                                                |
|------|-------------------------|------------------------------------------------------------------------------------------------------------------------------------------------------------------------------------------------------------------------------------------------------------------------------------------------------------------------------------------------------------------------------------------------|
|      |                         | Hyaluronic Acid-Based Hydrogels: A Review. <i>Int. J. Biol. Macromol.</i> <b>2023</b> , <i>231</i> , 123308.                                                                                                                                                                                                                                                                                   |
| 112. | (Mai, 2023)             | Mai, Y.; Zhang, J.; Huang, G.; He, J.; Liu, X.; Guo, L.; Wei, Z.; Jiang, L. Efficacy of the Combination Therapy of Platelet-Rich Plasma and Hyaluronic Acid on Improving Knee Pain and Dysfunction in Patients with Moderate-to-Severe KOA: A Protocol for a Randomised Controlled Trial. <i>BMJ Open</i> <b>2023</b> , <i>13</i> , e068743.                                                   |
| 113. | (Molloy, 2023)          | Molloy, I.B.; Holte, A.J.; Zhao, Y.; Parker, D.J.; Werth, P.M.; Jevsevar, D.S. The Effect of Intra-Articular Hyaluronic Acid Injections and Payer Coverage on Total Knee Arthroplasty Procedures: Evidence From Large US Claims Database. <i>Arthroplast Today</i> <b>2023</b> , <i>19</i> , 101080.                                                                                           |
| 114. | (Moon, 2023)            | Moon, J.Y.; Kim, J.; Lee, J.Y.; Ko, Y.; Park, H.J.; Jeon, Y.H. Comparison of Polynucleotide, Sodium Hyaluronate, and Crosslinked Sodium Hyaluronate for the Management of Painful Knee Osteoarthritis: A Multi-Center, Randomized, Double-Blind, Parallel-Group Study. <i>Pain Med.</i> <b>2023</b> , <i>24</i> , 496–506.                                                                     |
| 115. | (Muñoz-Salamanca, 2023) | Muñoz-Salamanca, J.A.; Gutierrez, M.; Echevarría-Trujillo, Á. Retrograde “Sandwich” Technique and Implantation of Minced Cartilage in a Hyaluronic Acid Scaffold for Deep Osteochondral Knee Lesions. <i>Arthrosc Tech</i> <b>2023</b> , <i>12</i> , e395–e400.                                                                                                                                |
| 116. | (Perruchet, 2023)       | Perruchet, S.; Balblanc, J.-C.; Rapp, C.; Bourgoign, C.; Guillochon, C.; Lohse, A.; Conrozier, T. The Association between Radiographic Features and the Duration of Effectiveness of a Single Injection of Extended-Release Hyaluronic Acid (HANOX-M-XL) in Patients with Knee Osteoarthritis: Preliminary Results of a Prospective Trial. <i>Cartilage</i> <b>2023</b> , <i>14</i> , 136–143. |
| 117. | (Porcello, 2023)        | Porcello, A.; Gonzalez-Fernandez, P.; Jeannerat, A.; Peneveyre, C.; Abdel-Sayed, P.; Scaletta, C.; Raffoul, W.; Hirt-Burri, N.; Applegate, L.A.; Allémann, E.; et al. Thermo-Responsive Hyaluronan-Based Hydrogels Combined with Allogeneic Cytotherapeutics for the Treatment of Osteoarthritis. <i>Pharmaceutics</i> <b>2023</b> , <i>15</i> , 1528.                                         |
| 118. | (Raeissadat, 2023)      | Raeissadat, S.A.; Rahimi, M.; Rayegani, S.M.; Moradi, N. Cost-Utility Analysis and Net Monetary Benefit of Platelet Rich Plasma (PRP), Intra-Articular Injections in Compared to Plasma Rich in Growth Factors (PRGF), Hyaluronic Acid (HA) and Ozone in Knee Osteoarthritis in Iran. <i>BMC Musculoskelet. Disord.</i> <b>2023</b> , <i>24</i> , 22.                                          |
| 119. | (Richard, 2023)         | Richard, M.J.; Driban, J.B.; McAlindon, T.E. Pharmaceutical Treatment of Osteoarthritis. <i>Osteoarthritis Cartilage</i> <b>2023</b> , <i>31</i> , 458–466.                                                                                                                                                                                                                                    |
| 120. | (Sahin, 2023)           | Sahin, N.; Yesil, H. Regenerative Methods in Osteoarthritis. <i>Best Pract. Res. Clin. Rheumatol.</i> <b>2023</b> , <i>37</i> , 101824.                                                                                                                                                                                                                                                        |
| 121. | (Saiz, 2023)            | Saiz, L.C.; Erviti, J.; Leache, L.; Gutiérrez-Valencia, M. Restoring Study PRGF: A Randomized Clinical Trial on Plasma Rich in Growth Factors for Knee Osteoarthritis. <i>Trials</i> <b>2023</b> , <i>24</i> , 37.                                                                                                                                                                             |
| 122. | (Saviola, 2023)         | Saviola, G.; Da Campo, G.; Bianchini, M.C.; Abdi-Ali, L.; Comini, L.; Rosini, S.; Molfetta, L. Intra-Articular Clodronate in Patients with Knee Osteoarthritis Non-Responder to Intra-Articular Hyaluronic Acid - a Case Report Series of 9 Patients with 8-Month Follow-Up. <i>Clin. Ter.</i> <b>2023</b> , <i>174</i> , 245–248.                                                             |

|      |                         |                                                                                                                                                                                                                                                                                                                                                                                                                    |
|------|-------------------------|--------------------------------------------------------------------------------------------------------------------------------------------------------------------------------------------------------------------------------------------------------------------------------------------------------------------------------------------------------------------------------------------------------------------|
| 123. | (Sconza, 2023)-1        | Sconza, C.; Di Matteo, B.; Queirazza, P.; Dina, A.; Amenta, R.; Respizzi, S.; Massazza, G.; Ammendolia, A.; Kon, E.; de Sire, A. Ozone Therapy versus Hyaluronic Acid Injections for Pain Relief in Patients with Knee Osteoarthritis: Preliminary Findings on Molecular and Clinical Outcomes from a Randomized Controlled Trial. <i>Int. J. Mol. Sci.</i> <b>2023</b> , <i>24</i> , doi:10.3390/ijms24108788.    |
| 124. | (Sconza, 2023)-2        | Sconza, C.; Leonardi, G.; Carfi, C.; Kon, E.; Respizzi, S.; Scaturro, D.; Letizia Mauro, G.; Massazza, G.; Di Matteo, B. Intra-Articular Injection of Botulinum Toxin for the Treatment of Knee Osteoarthritis: A Systematic Review of Randomized Controlled Trials. <i>Int. J. Mol. Sci.</i> <b>2023</b> , <i>24</i> , doi:10.3390/ijms24021486.                                                                  |
| 125. | (Shen, 2023)            | Shen, J.; Lin, X.; Lin, Y.; Xiao, J.; Wu, C.; Zheng, F.; Wu, X.; Lin, H.; Chen, G.; Liu, H. Supplementation of Hyaluronic Acid Injections with Vitamin D Improve Knee Function by Attenuating Synovial Fluid Oxidative Stress in Osteoarthritis Patients with Vitamin D Insufficiency. <i>Front Nutr</i> <b>2023</b> , <i>10</i> , 1026722.                                                                        |
| 126. | (Simental-Mendía, 2023) | Simental-Mendía, M.; Ortega-Mata, D.; Tamez-Mata, Y.; Olivo, C.A.A.; Vilchez-Cavazos, F. Comparison of the Clinical Effectiveness of Activated and Non-Activated Platelet-Rich Plasma in the Treatment of Knee Osteoarthritis: A Systematic Review and Meta-Analysis. <i>Clin. Rheumatol.</i> <b>2023</b> , <i>42</i> , 1397–1408.                                                                                 |
| 127. | (Siren, 2023)           | Siren, J.; Rämö, L.; Rantasalo, M.; Komulainen, O.; Skants, N.; Reito, A.; Kosola, J.; Lindahl, J. Unicompartmental knee arthroplasty vs. high tibial osteotomy for medial knee osteoarthritis (UNIKORN): a study protocol of a randomized controlled trial. <i>Trials</i> <b>2023</b> , <i>24</i> (1), 256.                                                                                                       |
| 128. | (Srinivasan, 2023)      | Srinivasan, V.; Ethiraj, P.; Agarawal, S.; H S, A.; Parmanantham, M. Comparison of Various Modalities in the Treatment of Early Knee Osteoarthritis: An Unsolved Controversy. <i>Cureus</i> <b>2023</b> , <i>15</i> , e33630.                                                                                                                                                                                      |
| 129. | (Tarantino, 2023)       | Tarantino, D.; Mottola, R.; Palermi, S.; Sirico, F.; Corrado, B.; Gnasso, R. Intra-Articular Collagen Injections for Osteoarthritis: A Narrative Review. <i>Int. J. Environ. Res. Public Health</i> <b>2023</b> , <i>20</i> , doi:10.3390/ijerph20054390.                                                                                                                                                          |
| 130. | (Tschopp, 2023)         | Tschopp, M.; Pfirrmann, C.W.A.; Fucentese, S.F.; Brunner, F.; Catanzaro, S.; Kühne, N.; Zwysig, I.; Sutter, R.; Götschi, T.; Tanadini, M.; et al. A Randomized Trial of Intra-Articular Injection Therapy for Knee Osteoarthritis. <i>Invest. Radiol.</i> <b>2023</b> , <i>58</i> , 355–362.                                                                                                                       |
| 131. | (Utamawatin, 2023)      | Utamawatin, K.; Phruetthiphat, O.-A.; Apinyankul, R.; Chaiamnuay, S. The Efficacy of Intra-Articular Triamcinolone Acetonide 10 Mg vs. 40 Mg in Patients with Knee Osteoarthritis: A Non-Inferiority, Randomized, Controlled, Double-Blind, Multicenter Study. <i>BMC Musculoskelet. Disord.</i> <b>2023</b> , <i>24</i> , 92.                                                                                     |
| 132. | (Vilchez-Cavazos, 2023) | Vilchez-Cavazos, F.; Blázquez-Saldaña, J.; Gamboa-Alonso, A.A.; Peña-Martínez, V.M.; Acosta-Olivo, C.A.; Sánchez-García, A.; Simental-Mendía, M. The Use of Platelet-Rich Plasma in Studies with Early Knee Osteoarthritis versus Advanced Stages of the Disease: A Systematic Review and Meta-Analysis of 31 Randomized Clinical Trials. <i>Arch. Orthop. Trauma. Surg.</i> <b>2023</b> , <i>143</i> , 1393–1408. |
| 133. | (Vinet, 2023)           | Vinet, M.; Le Stum, M.; Gicquel, T.; Clave, A.; Dubrana, F. Unicompartmental Knee Arthroplasty: A French Multicenteric                                                                                                                                                                                                                                                                                             |

|      |                |                                                                                                                                                                                                                                                                                                                             |
|------|----------------|-----------------------------------------------------------------------------------------------------------------------------------------------------------------------------------------------------------------------------------------------------------------------------------------------------------------------------|
|      |                | Retrospective Descriptive Study from 2009 to 2019 with Projections to 2050. <i>Orthop. Traumatol. Surg. Res.</i> <b>2023</b> , <i>109</i> , 103581.                                                                                                                                                                         |
| 134. | (Wang, 2023)   | Wang, P.-H.; Wu, C.-H.; Ma, C.-H.; Chiu, Y.-C.; Wu, P.-T.; Jou, I.-M. Comparison of Intra-Articular Injection of ArtiAid®-Mini with Ostenil®-Mini for Trapeziometacarpal Osteoarthritis: A Double-Blind, Prospective, Randomized, Non-Inferiority Trial. <i>Jt Dis Relat Surg</i> <b>2023</b> , <i>34</i> , 50–57.          |
| 135. | (Xie, 2023)    | Xie, G.; Wang, T.; Zhou, H.; Yi, L.; He, J.; Zhang, J.; Li, M.; Yang, Y. Repairing Effect and Mechanism of Hydroxysafflor Yellow A and Sodium Hyaluronate for Knee Osteoarthritis in Rabbits. <i>Altern. Ther. Health Med.</i> <b>2023</b> , <i>29</i> , 146–151.                                                           |
| 136. | (Xue, 2023)    | Xue, Y.; Wang, X.; Wang, X.; Huang, L.; Yao, A.; Xue, Y. A Comparative Study of the Efficacy of Intra-Articular Injection of Different Drugs in the Treatment of Mild to Moderate Knee Osteoarthritis: A Network Meta-Analysis. <i>Medicine</i> <b>2023</b> , <i>102</i> , e33339.                                          |
| 137. | (Ying, 2023)   | Ying, H.; Shen, C.; Pan, R.; Li, X.; Chen, Y. Strategy Insight: Mechanical Properties of Biomaterials' Influence on Hydrogel-Mesenchymal Stromal Cell Combination for Osteoarthritis Therapy. <i>Front. Pharmacol.</i> <b>2023</b> , <i>14</i> , 1152612.                                                                   |
| 138. | (Zhang, 2023)  | Zhang, Y.; Ruan, G.; Zheng, P.; Huang, S.; Zhou, X.; Liu, X.; Hu, W.; Feng, H.; Lin, Y.; He, J.; et al. Efficacy and Safety of GLucocorticoid Injections into Infrapatellar fat Pad in Patients with Knee osteoarthritis: Protocol for the GLITTERS Randomized Controlled Trial. <i>Trials</i> <b>2023</b> , <i>24</i> , 6. |
| 139. | (Zhou, 2023)-1 | Zhou, K.; Li, Y.-J.; Soderblom, E.J.; Reed, A.; Jain, V.; Sun, S.; Moseley, M.A.; Kraus, V.B. A “Best-in-Class” Systemic Biomarker Predictor of Clinically Relevant Knee Osteoarthritis Structural and Pain Progression. <i>Sci Adv</i> <b>2023</b> , <i>9</i> , eabq5095.                                                  |
| 140. | (Zhou, 2023)-2 | Zhou, Y.; Li, H.; Cao, S.; Han, Y.; Shao, J.; Fu, Q.; Wang, B.; Wu, J.; Xiang, D.; Liu, Z.; et al. Clinical Efficacy of Intra-Articular Injection with P-PRP Versus that of L-PRP in Treating Knee Cartilage Lesion: A Randomized Controlled Trial. <i>Orthop. Surg.</i> <b>2023</b> , <i>15</i> , 740–749.                 |
